# Supplementary material for: Retrospective Study of the Seroprevalence of HIV, HCV, and HBV in Blood Donors at a Blood Bank of Western Mexico
Source: MDPI journal article supplement (doi:10.3390/pathogens10070878), 2021-07-11
Supplement: s1 [file s1]

**Table S1.** HIV, HCV, and HBV seroreactive blood donors classified by Educational level and Occupation.

|                   |                     | HIV           |       |                | HCV           |       |                | HBV           |       |                |
|-------------------|---------------------|---------------|-------|----------------|---------------|-------|----------------|---------------|-------|----------------|
|                   |                     | Sero-reactive | Rate  | CI (95%)       | Sero-reactive | Rate  | CI (95%)       | Sero-reactive | Rate  | CI (95%)       |
| Educational level | Unlettered          | 1             | 0.12  | 0.00-0.37      | 4             | 0.50  | 0.01-0.99      | 1             | 0.12  | 0.00-0.37      |
|                   | Elementary          | 11            | 1.37  | 0.56-2.18      | 40            | 4.98  | 3.43-6.52      | 17            | 2.11  | 1.11-3.12      |
|                   | Junior high school  | 32            | 3.98  | 2.60-5.36      | 108           | 13.43 | 10.90-15.97    | 57            | 7.09  | 5.25-8.93      |
|                   | High school         | 49            | 6.10  | 4.39-7.80      | 95            | 11.82 | 9.44-14.19     | 52            | 6.47  | 4.71-8.23      |
|                   | Degree              | 43            | 5.35  | 3.75-6.95      | 91            | 11.32 | 9.00-13.64     | 42            | 5.22  | 3.64-6.80      |
|                   | Master's degree     | 3             | 0.37  | 0.00-0.80      | 6             | 0.75  | 0.15-1.34      | 2             | 0.25  | 0.00-0.59      |
|                   | PhD                 | 1             | 0.12  | 0.00-0.37      | 2             | 0.25  | 0.00-0.59      | 0             | 0.00  | does not apply |
|                   | Technical school    | 8             | 1.00  | 0.31-1.68      | 15            | 1.87  | 0.92-2.81      | 5             | 0.62  | 0.08-1.17      |
|                   | Knows how to read   | 1             | 0.12  | 0.00-0.37      | 1             | 0.12  | 0.00-0.37      | 0             | 0.00  | does not apply |
| Occupation        | Other               | 1             | 0.12  | 0.00-0.37      | 0             | 0.00  | does not apply | 0             | 0.00  | does not apply |
|                   | Housewife           | 9             | 1.12  | 0.39-1.85      | 39            | 4.85  | 3.33-6.37      | 25            | 3.11  | 1.89-4.33      |
|                   | Farmer              | 5             | 0.62  | 0.08-1.17      | 4             | 0.50  | 0.01-0.99      | 4             | 0.50  | 0.01-0.99      |
|                   | Merchant            | 8             | 1.00  | 0.31-1.68      | 26            | 3.23  | 1.99-4.48      | 8             | 1.00  | 0.31-1.68      |
|                   | Unemployed          | 6             | 0.75  | 0.15-1.34      | 6             | 0.75  | 0.15-1.34      | 3             | 0.37  | 0.00-0.80      |
|                   | Domestic employee   | 0             | 0.00  | does not apply | 1             | 0.12  | 0.00-0.37      | 1             | 0.12  | 0.00-0.37      |
|                   | Employee            | 88            | 10.95 | 8.66-13.23     | 198           | 24.63 | 21.20-28.06    | 89            | 11.07 | 8.77-13.37     |
|                   | Student             | 7             | 0.87  | 0.23-1.52      | 17            | 2.11  | 1.11-3.12      | 20            | 2.49  | 1.40-3.58      |
|                   | Retired             | 1             | 0.12  | 0.00-0.37      | 4             | 0.50  | 0.01-0.99      | 0             | 0.00  | does not apply |
|                   | Laborer             | 5             | 0.62  | 0.08-1.17      | 11            | 1.37  | 0.56-2.18      | 8             | 1.00  | 0.31-1.68      |
|                   | Professional        | 2             | 0.25  | 0.00-0.59      | 11            | 1.37  | 0.56-2.18      | 7             | 0.87  | 0.23-1.52      |
|                   | Construction worker | 4             | 0.50  | 0.01-0.99      | 2             | 0.25  | 0.00-0.59      | 1             | 0.12  | 0.00-0.37      |

Rates are expressed in cases per 10,000 and age range in years. HIV = Human Immunodeficiency Virus; HCV = Hepatitis C Virus; HBV= Hepatitis B Virus; CI = Confidence intervals (95%).
